# Supplementary material for: A morphological and functional basis for maximum prey size in piscivorous fishes
Source: PubMed Central journal article supplement (PMC5590994; doi:10.1371/journal.pone.0184679), 2017-09-08
Supplement: pone.0184679.s005.pdf [file pone.0184679.s005.pdf]

**S1 Table. Chi-square test.** The body regions that *Cephalopholis urodeta* and *Paracirrhites forsteri* attacked first.

| <b>Species</b>    | <b>Body Part</b> | <b>Observed</b> | <b>Expected</b> | <b>d.f</b> | <b>x<sup>2</sup></b> | <b>p</b> |
|-------------------|------------------|-----------------|-----------------|------------|----------------------|----------|
| <i>C.urodeta</i>  | Head             | 11              | 4.667           | 2          | 13.86                | 0.001    |
|                   | Mid              | 3               | 4.667           |            |                      |          |
|                   | Tail             | 0               | 4.667           |            |                      |          |
|                   | Sum              | 14              | 14              |            |                      |          |
| <i>P.forsteri</i> | Head             | 3               | 6               | 2          | 2.333                | 0.3114   |
|                   | Mid              | 8               | 6               |            |                      |          |
|                   | Tail             | 7               | 6               |            |                      |          |
|                   | Sum              | 18              | 18              |            |                      |          |
