# Supplementary material for: A morphological and functional basis for maximum prey size in piscivorous fishes
Source: PubMed Central journal article supplement (PMC5590994; doi:10.1371/journal.pone.0184679), 2017-09-08
Supplement: pone.0184679.s006.pdf [file pone.0184679.s006.pdf]

**S2\_Table. Binomial test.** Prey orientation when captured by *Cephalopholis urodeta* and *Paracirrhites forsteri*.

| <b>Species</b>    | <b>Orientation</b> | <b>Observed</b> | <b>Expected</b> | <b>95% C.I</b> | <b>p (2-tailed)</b> |
|-------------------|--------------------|-----------------|-----------------|----------------|---------------------|
| <i>C.urodeta</i>  | V                  | 8               | 7               | 32.59 to 78.62 | 0.7905              |
|                   | H                  | 6               | 7               | 21.38 to 67.41 |                     |
| <b>Sum</b>        |                    | 14              | 14              |                |                     |
| <i>P.forsteri</i> | V                  | 0               | 9               | 0 to 17.59     | <0.0001             |
|                   | H                  | 18              | 9               | 82.41 to 100   |                     |
| <b>Sum</b>        |                    | 18              | 18              |                |                     |
