# Supplementary material for: A morphological and functional basis for maximum prey size in piscivorous fishes
Source: PubMed Central journal article supplement (PMC5590994; doi:10.1371/journal.pone.0184679), 2017-09-08
Supplement: pone.0184679.s007.pdf [file pone.0184679.s007.pdf]

**S3 Table. Raw Data:** Morphological gape measurements for species used in the analyses.

| Species                       | SL    | a    | b    | c    | d    | e    | f    | g     | h    | i    | p    | q    | j    | k    | l    | m    | n1   | n2   | n3   |
|-------------------------------|-------|------|------|------|------|------|------|-------|------|------|------|------|------|------|------|------|------|------|------|
| <i>Cephalopholis urodeta</i>  | 105.1 | 27.9 | 24.3 | 29.8 | 23   | 28.1 | 22.4 | 28.5  | 20   | 22.7 | 19.7 | 20   | 17.9 | 18.6 | 16.4 | 20.5 | 15.5 | 11.5 | 7    |
| <i>Cephalopholis urodeta</i>  | 98.4  | 25.6 | 22.7 | 28.6 | 26.3 | 24.7 | 23.5 | 33.5  | 18.2 | 23.0 | 19.0 | 21.1 | 16.9 | 20.2 | 17.5 | 19.2 | 17.6 | 16.2 | 11.8 |
| <i>Cephalopholis urodeta</i>  | 85.5  | 22.6 | 18   | 27.5 | 21.7 | 22   | 18.5 | 25.7  | 17   | 19.1 | 18   | 18   | 15.7 | 15   | 13.4 | 14.5 | 10.5 | 9    | 4.2  |
| <i>Paracirrhites forsteri</i> | 71    | 14.6 | 9.6  | 14.5 | 12.6 | 14.5 | 12.6 | 14.2  | 10.7 | 10.6 | 8.8  | 9.6  | 8.4  | 8.4  | 6.3  | 7.1  | 7    | 7.4  | 7.4  |
| <i>Paracirrhites forsteri</i> | 109   | 20   | 18.5 | 21.1 | 19.6 | 22   | 19.3 | 22.9  | 16   | 18.8 | 14.3 | 14.9 | 12.8 | 14   | 12.6 | 14.4 | 12.2 | 8.7  | 10   |
| <i>Paracirrhites forsteri</i> | 94    | 17.5 | 15.7 | 18.8 | 16   | 19.7 | 16.2 | 19.3  | 14.7 | 15.9 | 14.9 | 13.7 | 12.4 | 12.9 | 11.1 | 13.5 | 12.6 | 12.5 | 9    |
| <i>Pterois volitans</i>       | 119.2 | 27.4 | 22.8 | 32   | 26.8 | 28.6 | 25.6 | 30    | 18.1 | 22.8 | 27.5 | 21.2 | 17.3 | 18.4 | 13.6 | 17.5 | 16.2 | 16.8 | 15.9 |
| <i>Pterois volitans</i>       | 121.7 | 28   | 22.5 | 35.7 | 32.5 | 29.6 | 27.4 | 31.9  | 22.3 | 26.8 | 27.6 | 23.4 | 18.8 | 18.9 | 16.2 | 17.4 | 16.5 | 14.9 | 13.2 |
| <i>Pterois volitans</i>       | 123.2 | 31.2 | 24.7 | 35.5 | 26.7 | 30.3 | 27.2 | 30.9  | 23.9 | 27.5 | 20.1 | 22.9 | 19.4 | 20   | 15.2 | 18.6 | 19.5 | 20.3 | 15.8 |
| <i>Lates calcarifer</i>       | 126.5 | 22   | 21   | 27   | 25.6 | 24   | 22.5 | 21.93 | 15.2 | 17.5 | 18.1 | 18.3 | 12.2 | 16.2 | 12.3 | 12.5 | 14.5 | 19.2 | 11.7 |
| <i>Lates calcarifer</i>       | 128.2 | 20.5 | 20.7 | 28   | 25   | 23.5 | 22.5 | 26.19 | 17.1 | 20   | 22.6 | 16.5 | 14.5 | 17.9 | 10.7 | 11.1 | 16.1 | 16.4 | 11.4 |
| <i>Lates calcarifer</i>       | 139.3 | 24.9 | 23.2 | 30.3 | 28.1 | 27.3 | 24.5 | 28.16 | 16.2 | 23.3 | 21.5 | 21.4 | 15.1 | 19   | 11.3 | 13   | 12.6 | 17.5 | 9.6  |
