# Supplementary material for: A morphological and functional basis for maximum prey size in piscivorous fishes
Source: PubMed Central journal article supplement (PMC5590994; doi:10.1371/journal.pone.0184679), 2017-09-08
Supplement: pone.0184679.s008.pdf [file pone.0184679.s008.pdf]

**S4 Table. Raw Data:** Maximum prey size performance experiments.

| <b>Species</b>                | <b>SL</b> | <b>Prey SL</b> | <b>Prey MD</b> | <b>Outcome</b> |
|-------------------------------|-----------|----------------|----------------|----------------|
| <i>Cephalopholis urodeta</i>  | 105.1     | 77.8           | 39             | 0              |
|                               |           | 64.7           | 32             | 0              |
|                               |           | 65.3           | 30.5           | 0              |
|                               |           | 47             | 22.3           | 1              |
|                               |           | 49.7           | 22.9           | 1              |
|                               |           | 54.2           | 26             | 1              |
| <i>Cephalopholis urodeta</i>  | 98.4      | 42.8           | 23             | 1              |
|                               |           | 52.1           | 24.5           | 1              |
|                               |           | 52.7           | 27             | 1              |
|                               |           | 70.5           | 35.5           | 0              |
|                               |           | 65             | 31             | 0              |
|                               |           | 64.7           | 30             | 0              |
| <i>Cephalopholis urodeta</i>  | 85.5      | 46.8           | 24             | 0              |
|                               |           | 43.3           | 21             | 0              |
|                               |           | 49.5           | 24.2           | 0              |
|                               |           | 35.5           | 17.2           | 1              |
|                               |           | 42.2           | 21             | 1              |
|                               |           | 47             | 23.5           | 1              |
| <i>Paracirrhites forsteri</i> | 71        | 30.3           | 14.9           | 0              |
|                               |           | 35             | 16.3           | 0              |
|                               |           | 32.7           | 15.5           | 0              |
|                               |           | 17.2           | 8.5            | 1              |
|                               |           | 29.1           | 13.1           | 1              |
| <i>Paracirrhites forsteri</i> | 109       | 48.9           | 27             | 0              |
|                               |           | 47             | 22.3           | 0              |
|                               |           | 45.6           | 23.1           | 0              |
|                               |           | 47.1           | 22.1           | 0              |
|                               |           | 41.5           | 19.5           | 1              |
|                               |           | 43.8           | 21.4           | 1              |
| <i>Paracirrhites forsteri</i> | 94        | 51             | 24.8           | 0              |
|                               |           | 46.6           | 22.3           | 0              |
|                               |           | 46.4           | 22             | 0              |
|                               |           | 43             | 20             | 0              |
|                               |           | 40.5           | 19.2           | 0              |
|                               |           | 39.8           | 18.1           | 0              |
|                               |           | 36.9           | 18.3           | 1              |
|                               |           | 36.3           | 16.7           | 1              |
