# Supplementary material for: A morphological and functional basis for maximum prey size in piscivorous fishes
Source: PubMed Central journal article supplement (PMC5590994; doi:10.1371/journal.pone.0184679), 2017-09-08
Supplement: pone.0184679.s009.pdf [file pone.0184679.s009.pdf]

**S5 Table. Raw Data:** Compressibility test on *Acanthochromis polyacanthus*.

| <b>SL</b> | <b>MD</b> | <b>MDC</b> |
|-----------|-----------|------------|
| 30.7      | 13.2      | 7.8        |
| 34        | 16.2      | 9.3        |
| 35        | 15.6      | 9.5        |
| 36.8      | 17.6      | 11.5       |
| 38.5      | 18.4      | 12         |
| 41.7      | 20        | 13         |
| 45.2      | 21.3      | 13.4       |
| 45.4      | 19.9      | 13         |
| 45.4      | 20.9      | 15         |
| 46.3      | 22        | 14.5       |
| 49.1      | 22.9      | 16.4       |
| 49.2      | 24.1      | 16.4       |
| 49.7      | 23.5      | 15.6       |
| 52.7      | 25        | 17.5       |
| 56.5      | 28.1      | 20.4       |
| 79.6      | 38        | 29.6       |
| 40.2      | 17.8      | 9.3        |
| 34.6      | 16.5      | 9.2        |
| 33        | 13.8      | 6.5        |
| 35        | 15.4      | 5.8        |
| 34.2      | 15        | 8.9        |
| 41.3      | 18.5      | 11.9       |
| 38.2      | 16.7      | 8.5        |
| 37.4      | 15.9      | 10         |
| 36        | 15.7      | 8.3        |
| 29.9      | 13.1      | 4          |
| 34.5      | 14.6      | 7.7        |
| 34.8      | 14.3      | 8.2        |
| 37.9      | 18.2      | 11.9       |
| 36.5      | 16        | 7.7        |
| 30.5      | 13.2      | 5.8        |
| 33.1      | 14.9      | 7.6        |
| 35.2      | 15.3      | 9.6        |
| 34.3      | 16.2      | 8.8        |
| 34.5      | 14.3      | 5.8        |
| 36.3      | 16        | 7.8        |
| 81.7      | 39        | 32.4       |
| 77.6      | 35.5      | 30         |
