# Supplementary material for: A morphological and functional basis for maximum prey size in piscivorous fishes
Source: PubMed Central journal article supplement (PMC5590994; doi:10.1371/journal.pone.0184679), 2017-09-08
Supplement: pone.0184679.s010.pdf [file pone.0184679.s010.pdf]

**S6 Table. Raw Data:** Behaviour of capturing and processing prey by predators.

| Species                      | SL    | Prey SL | Prey MD | Outcome | Suc. Strikes | Orient. Capt. | Capture at | Orient. Proc. | Process starting at |      |
|------------------------------|-------|---------|---------|---------|--------------|---------------|------------|---------------|---------------------|------|
| <i>Cephalopholis urodeta</i> | 105.1 | 47      | 22.3    | 1       | 1            | V             | Head       | H             | Head                |      |
|                              |       | 48.9    | 27      | 0       | 3            | V             | Head       |               |                     |      |
|                              |       |         |         |         |              |               | H          | Head          |                     |      |
|                              |       |         |         |         |              |               | V          | Head          |                     |      |
|                              |       | 49.7    | 22.9    | 1       | 1            | V             | Head       | H             | Head                |      |
|                              |       | 54.2    | 26      | 1       | 1            | H             | Mid        | H             | Head                |      |
|                              |       | 64.7    | 32      | 0       | 0            |               |            |               |                     |      |
|                              |       | 65.3    | 30.5    | 0       | 0            |               |            |               |                     |      |
| 77.8                         | 39    | 0       | 0       |         |              |               |            |               |                     |      |
| <i>Cephalopholis urodeta</i> | 98.4  | 42.8    | 23      | 1       | 1            | H             | Mid        | H             | Head                |      |
|                              |       | 52.1    | 24.5    | 1       | 1            | H             | Head       | H             | Head                |      |
|                              |       | 52.7    | 27      | 1       | 1            | H             | Mid        |               |                     |      |
|                              |       | 64.7    | 30      | 0       | 0            |               |            |               |                     |      |
|                              |       | 65      | 31      | 0       | 0            |               |            |               |                     |      |
|                              |       | 70.5    | 35.5    | 0       | 0            |               |            |               |                     |      |
| <i>Cephalopholis urodeta</i> | 85.5  | 35.5    | 17.2    | 1       | 1            | H             | Head       | H             | Head                |      |
|                              |       | 42.2    | 21      | 1       | 1            | V             | Head       | H             | Head                |      |
|                              |       | 43.4    | 21      | 0       | 1            | V             | Head       | H             | Head                |      |
|                              |       | 46.8    | 24      | 0       | 0            |               |            |               |                     |      |
|                              |       | 47      | 23.5    | 1       | 1            | H             | Head       | H             | Head                |      |
|                              |       | 49.5    | 24.2    | 0       | 1            | H             | Head       |               |                     |      |
|                              |       |         |         |         |              |               |            |               |                     |      |
| <i>P.forsteri</i>            | 71    | 35      | 16.3    | 0       | 1            | H             | Tail       |               |                     |      |
|                              |       | 32.7    | 15.5    | 0       | 3            | H             | Tail       |               |                     |      |
|                              |       |         |         |         |              |               | H          | Mid           |                     |      |
|                              |       |         |         |         |              |               | H          | Tail          |                     |      |
|                              |       | 30.3    | 14.9    | 0       | 0            |               |            |               |                     |      |
|                              |       | 29.1    | 13.1    | 1       | 2            | H             | Tail       |               |                     |      |
|                              |       |         |         |         |              |               | H          | Head          | H                   | Head |
| 17.2                         | 8.5   | 1       | 1       |         |              | Head          |            |               |                     |      |
| <i>P.forsteri</i>            | 109   | 48.9    | 27      | 0       | 1            | H             | Mid        |               |                     |      |
|                              |       | 47.1    | 22      | 0       | 2            | H             | Tail       |               |                     |      |
|                              |       |         |         |         |              |               | H          | Mid           |                     |      |
|                              |       | 45.6    | 23.1    | 0       | 4            | H             | Mid        |               |                     |      |
|                              |       |         |         |         |              |               | H          | Tail          |                     |      |
|                              |       |         |         |         |              |               | H          | Head          |                     |      |
|                              |       |         |         |         | H            | Head          |            |               |                     |      |
| 43.8                         | 21.4  | 1       |         | H       | Mid          | H             | Head       |               |                     |      |

|                   |    |      |      |   |   |   |      |   |      |
|-------------------|----|------|------|---|---|---|------|---|------|
|                   |    | 41.5 | 19.5 | 1 | 1 | H | Mid  |   |      |
|                   |    |      |      |   |   | H | Tail | H | Tail |
| <i>P.forsteri</i> | 94 | 35.7 | 17.5 | 0 | 1 | H | Tail |   |      |
|                   |    | 36.3 | 16.7 | 1 | 2 | H | Mid  |   |      |
|                   |    |      |      |   |   | H | Tail | H | Head |
|                   |    | 36.9 | 18.3 | 1 | 1 | H | Mid  | H | Head |
